# Supplementary material
Source: publisher figshare collection journal article supplement (https://acs.figshare.com/ndownloader/files/4278332)
Supplement: Supplementary file 1 [file 4278332]

 
data_4
 
_audit_creation_method            SHELXL-97
_chemical_name_systematic
;
 ?
;
_chemical_name_common             ?
_chemical_melting_point           ?
_chemical_formula_moiety          ?
_chemical_formula_sum
 'C50 H59 N7 O Os'
_chemical_formula_weight          964.24
 
loop_
 _atom_type_symbol
 _atom_type_description
 _atom_type_scat_dispersion_real
 _atom_type_scat_dispersion_imag
 _atom_type_scat_source
 'C'  'C'   0.0033   0.0016
 'International Tables Vol C Tables 4.2.6.8 and 6.1.1.4'
 'H'  'H'   0.0000   0.0000
 'International Tables Vol C Tables 4.2.6.8 and 6.1.1.4'
 'N'  'N'   0.0061   0.0033
 'International Tables Vol C Tables 4.2.6.8 and 6.1.1.4'
 'O'  'O'   0.0106   0.0060
 'International Tables Vol C Tables 4.2.6.8 and 6.1.1.4'
 'Os'  'Os'  -1.2165   7.6030
 'International Tables Vol C Tables 4.2.6.8 and 6.1.1.4'
 
_symmetry_cell_setting           'Monoclinic'
_symmetry_space_group_name_H-M   'C 2/c'
 
loop_
 _symmetry_equiv_pos_as_xyz
 'x, y, z'
 '-x, y, -z+1/2'
 'x+1/2, y+1/2, z'
 '-x+1/2, y+1/2, -z+1/2'
 '-x, -y, -z'
 'x, -y, z-1/2'
 '-x+1/2, -y+1/2, -z'
 'x+1/2, -y+1/2, z-1/2'
 
_cell_length_a                    24.1605(16)
_cell_length_b                    13.2360(11)
_cell_length_c                    30.241(2)
_cell_angle_alpha                 90.00
_cell_angle_beta                  110.005(8)
_cell_angle_gamma                 90.00
_cell_volume                      9087.3(12)
_cell_formula_units_Z             8
_cell_measurement_temperature     150(2)
_cell_measurement_reflns_used   7990
_cell_measurement_theta_min     2.9606
_cell_measurement_theta_max     32.4830
 
_exptl_crystal_description        block
_exptl_crystal_colour             black
_exptl_crystal_size_max           0.23
_exptl_crystal_size_mid           0.16
_exptl_crystal_size_min           0.14
_exptl_crystal_density_meas       ?
_exptl_crystal_density_diffrn     1.410
_exptl_crystal_density_method     'not measured'
_exptl_crystal_F_000              3936
_exptl_absorpt_coefficient_mu     2.851
_exptl_absorpt_correction_T_min   0.5601
_exptl_absorpt_correction_T_max   0.6910
_exptl_absorpt_correction_type            'multi-scan'
_exptl_absorpt_process_details
;
CrysAlis RED, Oxford Diffraction Ltd.,
Version 1.171.31.7 (release 18-10-2006 CrysAlis171 .NET)
(compiled Oct 18 2006,16:28:17)
Empirical absorption correction using spherical harmonics,
 implemented in SCALE3 ABSPACK scaling algorithm.
;
 
_diffrn_ambient_temperature       120(2)
_diffrn_radiation_wavelength      0.71073
_diffrn_radiation_type            MoK\a
_diffrn_radiation_source          'Enhance (Mo) X-ray Source'
_diffrn_radiation_monochromator   graphite
_diffrn_measurement_device_type   'OXFORD DIFFRACTION XCALIBUR-S'
_diffrn_measurement_method        '\w/q-scan'
_diffrn_detector_area_resol_mean  15.9948
_diffrn_standards_number          ?
_diffrn_standards_interval_count  ?
_diffrn_standards_interval_time   ?
_diffrn_standards_decay_%         ?
_diffrn_reflns_number             36275
_diffrn_reflns_av_R_equivalents   0.0434
_diffrn_reflns_av_sigmaI/netI     0.0380
_diffrn_reflns_limit_h_min        -28
_diffrn_reflns_limit_h_max        28
_diffrn_reflns_limit_k_min        -15
_diffrn_reflns_limit_k_max        15
_diffrn_reflns_limit_l_min        -35
_diffrn_reflns_limit_l_max        35
_diffrn_reflns_theta_min          2.97
_diffrn_reflns_theta_max          25.00
_reflns_number_total              8004
_reflns_number_gt                 6358
_reflns_threshold_expression      >2sigma(I)
 
_computing_data_collection        'CrysAlis CCD, Oxford Diffraction Ltd.,'
_computing_cell_refinement        'CrysAlis RED, Oxford Diffraction Ltd.,'
_computing_data_reduction         'CrysAlis RED, Oxford Diffraction Ltd.,'
_computing_structure_solution     'SHELXS-97 (Sheldrick, 1997)'
_computing_structure_refinement   'SHELXL-97 (Sheldrick, 1997)'
_computing_molecular_graphics     'Ortep3'
_computing_publication_material   'Shelx97'
 
_refine_special_details
;
 Refinement of F^2^ against ALL reflections.  The weighted R-factor wR and
 goodness of fit S are based on F^2^, conventional R-factors R are based
 on F, with F set to zero for negative F^2^. The threshold expression of
 F^2^ > 2sigma(F^2^) is used only for calculating R-factors(gt) etc. and is
 not relevant to the choice of reflections for refinement.  R-factors based
 on F^2^ are statistically about twice as large as those based on F, and R-
 factors based on ALL data will be even larger.
;
 
_refine_ls_structure_factor_coef  Fsqd
_refine_ls_matrix_type            full
_refine_ls_weighting_scheme       calc
_refine_ls_weighting_details
 'calc w=1/[\s^2^(Fo^2^)+(0.0291P)^2^+0.0000P] where P=(Fo^2^+2Fc^2^)/3'
_atom_sites_solution_primary      direct
_atom_sites_solution_secondary    difmap
_atom_sites_solution_hydrogens    geom
_refine_ls_hydrogen_treatment     RIDING
_refine_ls_extinction_method      none
_refine_ls_extinction_coef        ?
_refine_ls_number_reflns          8004
_refine_ls_number_parameters      544
_refine_ls_number_restraints      0
_refine_ls_R_factor_all           0.0327
_refine_ls_R_factor_gt            0.0227
_refine_ls_wR_factor_ref          0.0505
_refine_ls_wR_factor_gt           0.0493
_refine_ls_goodness_of_fit_ref    0.927
_refine_ls_restrained_S_all       0.927
_refine_ls_shift/su_max           0.001
_refine_ls_shift/su_mean          0.000
 
loop_
 _atom_site_label
 _atom_site_type_symbol
 _atom_site_fract_x
 _atom_site_fract_y
 _atom_site_fract_z
 _atom_site_U_iso_or_equiv
 _atom_site_adp_type
 _atom_site_occupancy
 _atom_site_symmetry_multiplicity
 _atom_site_calc_flag
 _atom_site_refinement_flags
 _atom_site_disorder_assembly
 _atom_site_disorder_group
Os1 Os 0.797268(5) 0.189993(9) 0.642387(4) 0.01746(4) Uani 1 1 d . . .
O1 O 0.84730(8) 0.30841(16) 0.63512(6) 0.0203(4) Uani 1 1 d . . .
N1 N 0.73904(10) 0.30390(19) 0.62911(8) 0.0175(5) Uani 1 1 d . . .
N2 N 0.77127(10) 0.13965(18) 0.57578(8) 0.0190(5) Uani 1 1 d . . .
N3 N 0.70674(10) 0.04069(19) 0.59915(8) 0.0216(6) Uani 1 1 d . . .
N4 N 0.73763(10) 0.08572(18) 0.63945(8) 0.0171(5) Uani 1 1 d . . .
N5 N 0.83631(10) 0.22317(18) 0.71221(8) 0.0199(6) Uani 1 1 d . . .
N6 N 0.91694(11) 0.1482(2) 0.69947(8) 0.0230(6) Uani 1 1 d . . .
N7 N 0.87308(10) 0.11572(18) 0.66142(8) 0.0190(5) Uani 1 1 d . . .
C1 C 0.82222(13) 0.3986(2) 0.63188(9) 0.0189(7) Uani 1 1 d . . .
C2 C 0.85163(13) 0.4901(2) 0.63223(9) 0.0192(6) Uani 1 1 d . . .
C3 C 0.81869(13) 0.5773(2) 0.62451(9) 0.0217(7) Uani 1 1 d . . .
H3 H 0.8382 0.6396 0.6245 0.026 Uiso 1 1 calc R . .
C4 C 0.75775(13) 0.5797(2) 0.61664(9) 0.0214(7) Uani 1 1 d . . .
C5 C 0.73018(13) 0.4898(2) 0.61855(9) 0.0209(7) Uani 1 1 d . . .
H5 H 0.6893 0.4893 0.6139 0.025 Uiso 1 1 calc R . .
C6 C 0.76157(13) 0.3995(2) 0.62721(9) 0.0186(7) Uani 1 1 d . . .
C7 C 0.91844(13) 0.4911(2) 0.64134(10) 0.0240(7) Uani 1 1 d . . .
C8 C 0.93133(13) 0.4337(3) 0.60197(11) 0.0336(8) Uani 1 1 d . . .
H8A H 0.9109 0.4667 0.5717 0.050 Uiso 1 1 calc R . .
H8B H 0.9175 0.3639 0.6010 0.050 Uiso 1 1 calc R . .
H8C H 0.9738 0.4339 0.6080 0.050 Uiso 1 1 calc R . .
C9 C 0.95115(14) 0.4410(3) 0.68857(11) 0.0359(8) Uani 1 1 d . . .
H9A H 0.9936 0.4425 0.6944 0.054 Uiso 1 1 calc R . .
H9B H 0.9381 0.3708 0.6879 0.054 Uiso 1 1 calc R . .
H9C H 0.9428 0.4776 0.7137 0.054 Uiso 1 1 calc R . .
C10 C 0.94195(14) 0.5982(3) 0.64314(13) 0.0373(9) Uani 1 1 d . . .
H10A H 0.9345 0.6357 0.6685 0.056 Uiso 1 1 calc R . .
H10B H 0.9220 0.6320 0.6130 0.056 Uiso 1 1 calc R . .
H10C H 0.9844 0.5960 0.6490 0.056 Uiso 1 1 calc R . .
C11 C 0.72449(14) 0.6802(2) 0.60515(11) 0.0291(7) Uani 1 1 d . . .
C12 C 0.75472(17) 0.7591(3) 0.64284(13) 0.0414(9) Uani 1 1 d . . .
H12A H 0.7540 0.7362 0.6734 0.062 Uiso 1 1 calc R . .
H12B H 0.7338 0.8237 0.6347 0.062 Uiso 1 1 calc R . .
H12C H 0.7956 0.7679 0.6445 0.062 Uiso 1 1 calc R . .
C13 C 0.72501(19) 0.7175(3) 0.55731(13) 0.0521(11) Uani 1 1 d . . .
H13A H 0.7658 0.7235 0.5582 0.078 Uiso 1 1 calc R . .
H13B H 0.7057 0.7836 0.5503 0.078 Uiso 1 1 calc R . .
H13C H 0.7039 0.6692 0.5328 0.078 Uiso 1 1 calc R . .
C14 C 0.66052(15) 0.6710(3) 0.60268(14) 0.0408(9) Uani 1 1 d . . .
H14A H 0.6400 0.6219 0.5783 0.061 Uiso 1 1 calc R . .
H14B H 0.6411 0.7369 0.5949 0.061 Uiso 1 1 calc R . .
H14C H 0.6594 0.6483 0.6332 0.061 Uiso 1 1 calc R . .
C15 C 0.67779(12) 0.2966(2) 0.62375(10) 0.0189(6) Uani 1 1 d . . .
C16 C 0.65820(13) 0.3309(2) 0.65874(10) 0.0205(7) Uani 1 1 d . . .
H16 H 0.6857 0.3596 0.6863 0.025 Uiso 1 1 calc R . .
C17 C 0.59922(12) 0.3247(2) 0.65477(10) 0.0201(7) Uani 1 1 d . . .
C18 C 0.56014(13) 0.2814(2) 0.61362(10) 0.0209(7) Uani 1 1 d . . .
H18 H 0.5197 0.2757 0.6102 0.025 Uiso 1 1 calc R . .
C19 C 0.57874(13) 0.2465(2) 0.57766(10) 0.0206(7) Uani 1 1 d . . .
C20 C 0.63824(13) 0.2553(2) 0.58319(10) 0.0205(7) Uani 1 1 d . . .
H20 H 0.6518 0.2328 0.5588 0.025 Uiso 1 1 calc R . .
C21 C 0.79633(13) 0.1629(2) 0.54322(10) 0.0232(7) Uani 1 1 d . . .
H21 H 0.8265 0.2126 0.5506 0.028 Uiso 1 1 calc R . .
C22 C 0.77965(14) 0.1173(3) 0.50041(11) 0.0297(8) Uani 1 1 d . . .
H22 H 0.7981 0.1348 0.4783 0.036 Uiso 1 1 calc R . .
C23 C 0.73497(14) 0.0441(3) 0.48902(11) 0.0300(8) Uani 1 1 d . . .
H23 H 0.7228 0.0120 0.4591 0.036 Uiso 1 1 calc R . .
C24 C 0.70936(14) 0.0196(2) 0.52101(10) 0.0263(7) Uani 1 1 d . . .
H24 H 0.6788 -0.0294 0.5136 0.032 Uiso 1 1 calc R . .
C25 C 0.72831(12) 0.0672(2) 0.56507(9) 0.0199(6) Uani 1 1 d . . .
C26 C 0.71518(12) 0.0643(2) 0.67674(10) 0.0208(7) Uani 1 1 d . . .
C27 C 0.65501(13) 0.0636(2) 0.66814(11) 0.0257(7) Uani 1 1 d . . .
H27 H 0.6279 0.0726 0.6371 0.031 Uiso 1 1 calc R . .
C28 C 0.63516(14) 0.0497(3) 0.70539(11) 0.0324(8) Uani 1 1 d . . .
H28 H 0.5940 0.0495 0.6999 0.039 Uiso 1 1 calc R . .
C29 C 0.67428(15) 0.0361(2) 0.75052(11) 0.0327(8) Uani 1 1 d . . .
H29 H 0.6602 0.0282 0.7760 0.039 Uiso 1 1 calc R . .
C30 C 0.73397(15) 0.0341(2) 0.75838(11) 0.0292(8) Uani 1 1 d . . .
H30 H 0.7609 0.0229 0.7893 0.035 Uiso 1 1 calc R . .
C31 C 0.75476(13) 0.0482(2) 0.72163(10) 0.0248(7) Uani 1 1 d . . .
H31 H 0.7959 0.0468 0.7271 0.030 Uiso 1 1 calc R . .
C32 C 0.81323(14) 0.2661(2) 0.74259(10) 0.0240(7) Uani 1 1 d . . .
H32 H 0.7719 0.2771 0.7327 0.029 Uiso 1 1 calc R . .
C33 C 0.84732(15) 0.2941(2) 0.78690(11) 0.0295(8) Uani 1 1 d . . .
H33 H 0.8300 0.3253 0.8073 0.035 Uiso 1 1 calc R . .
C34 C 0.90797(15) 0.2767(3) 0.80211(11) 0.0294(8) Uani 1 1 d . . .
H34 H 0.9322 0.2966 0.8328 0.035 Uiso 1 1 calc R . .
C35 C 0.93219(14) 0.2312(3) 0.77279(11) 0.0289(8) Uani 1 1 d . . .
H35 H 0.9734 0.2192 0.7827 0.035 Uiso 1 1 calc R . .
C36 C 0.89535(13) 0.2022(2) 0.72769(10) 0.0237(7) Uani 1 1 d . . .
C37 C 0.89140(13) 0.0535(2) 0.63083(10) 0.0247(7) Uani 1 1 d . . .
C38 C 0.93793(14) 0.0821(3) 0.61673(11) 0.0307(8) Uani 1 1 d . . .
H38 H 0.9609 0.1398 0.6301 0.037 Uiso 1 1 calc R . .
C39 C 0.95038(16) 0.0252(3) 0.58294(12) 0.0423(10) Uani 1 1 d . . .
H39 H 0.9824 0.0438 0.5732 0.051 Uiso 1 1 calc R . .
C40 C 0.91701(18) -0.0578(3) 0.56335(12) 0.0486(11) Uani 1 1 d . . .
H40 H 0.9254 -0.0953 0.5396 0.058 Uiso 1 1 calc R . .
C41 C 0.87152(17) -0.0867(3) 0.57803(12) 0.0439(10) Uani 1 1 d . . .
H41 H 0.8488 -0.1447 0.5647 0.053 Uiso 1 1 calc R . .
C42 C 0.85865(15) -0.0322(2) 0.61189(11) 0.0327(8) Uani 1 1 d . . .
H42 H 0.8275 -0.0529 0.6223 0.039 Uiso 1 1 calc R . .
C43 C 0.53585(13) 0.2041(3) 0.53102(10) 0.0272(7) Uani 1 1 d . . .
C44 C 0.56091(16) 0.1079(3) 0.51741(14) 0.0600(13) Uani 1 1 d . . .
H44A H 0.5317 0.0781 0.4895 0.090 Uiso 1 1 calc R . .
H44B H 0.5705 0.0597 0.5435 0.090 Uiso 1 1 calc R . .
H44C H 0.5966 0.1243 0.5105 0.090 Uiso 1 1 calc R . .
C45 C 0.47604(14) 0.1766(3) 0.53423(12) 0.0398(9) Uani 1 1 d . . .
H45A H 0.4508 0.1482 0.5041 0.060 Uiso 1 1 calc R . .
H45B H 0.4575 0.2373 0.5414 0.060 Uiso 1 1 calc R . .
H45C H 0.4814 0.1265 0.5592 0.060 Uiso 1 1 calc R . .
C46 C 0.5262(2) 0.2841(4) 0.49322(13) 0.0665(15) Uani 1 1 d . . .
H46A H 0.5636 0.2989 0.4887 0.100 Uiso 1 1 calc R . .
H46B H 0.5110 0.3458 0.5029 0.100 Uiso 1 1 calc R . .
H46C H 0.4977 0.2593 0.4636 0.100 Uiso 1 1 calc R . .
C47 C 0.57957(13) 0.3678(2) 0.69376(10) 0.0245(7) Uani 1 1 d . . .
C48 C 0.51528(14) 0.3433(3) 0.68680(12) 0.0366(9) Uani 1 1 d . . .
H48A H 0.5048 0.3726 0.7127 0.055 Uiso 1 1 calc R . .
H48B H 0.5100 0.2698 0.6864 0.055 Uiso 1 1 calc R . .
H48C H 0.4898 0.3718 0.6568 0.055 Uiso 1 1 calc R . .
C49 C 0.58623(14) 0.4821(3) 0.69395(11) 0.0312(8) Uani 1 1 d . . .
H49A H 0.6273 0.4994 0.6986 0.047 Uiso 1 1 calc R . .
H49B H 0.5751 0.5110 0.7196 0.047 Uiso 1 1 calc R . .
H49C H 0.5606 0.5096 0.6638 0.047 Uiso 1 1 calc R . .
C50 C 0.61819(15) 0.3266(3) 0.74184(11) 0.0375(9) Uani 1 1 d . . .
H50A H 0.6594 0.3451 0.7477 0.056 Uiso 1 1 calc R . .
H50B H 0.6147 0.2528 0.7420 0.056 Uiso 1 1 calc R . .
H50C H 0.6052 0.3554 0.7665 0.056 Uiso 1 1 calc R . .
 
loop_
 _atom_site_aniso_label
 _atom_site_aniso_U_11
 _atom_site_aniso_U_22
 _atom_site_aniso_U_33
 _atom_site_aniso_U_23
 _atom_site_aniso_U_13
 _atom_site_aniso_U_12
Os1 0.01782(6) 0.01595(6) 0.01885(6) 0.00026(6) 0.00659(4) -0.00012(6)
O1 0.0193(10) 0.0173(10) 0.0267(10) -0.0009(10) 0.0110(8) -0.0031(10)
N1 0.0160(12) 0.0166(13) 0.0207(12) -0.0052(11) 0.0075(10) -0.0004(12)
N2 0.0226(13) 0.0153(13) 0.0187(12) 0.0014(10) 0.0067(11) 0.0028(11)
N3 0.0218(13) 0.0189(14) 0.0222(13) -0.0030(11) 0.0050(11) -0.0005(11)
N4 0.0171(12) 0.0159(13) 0.0165(12) 0.0010(10) 0.0034(10) -0.0018(11)
N5 0.0209(13) 0.0185(13) 0.0197(12) 0.0014(10) 0.0061(11) -0.0026(11)
N6 0.0214(14) 0.0230(14) 0.0233(13) 0.0031(11) 0.0058(11) -0.0007(12)
N7 0.0208(13) 0.0185(13) 0.0184(12) 0.0026(11) 0.0075(11) 0.0027(11)
C1 0.0212(15) 0.0195(17) 0.0141(14) 0.0023(12) 0.0037(12) 0.0000(13)
C2 0.0238(16) 0.0201(16) 0.0148(14) -0.0031(12) 0.0082(12) -0.0080(14)
C3 0.0326(17) 0.0172(16) 0.0165(14) -0.0008(13) 0.0099(13) -0.0054(15)
C4 0.0310(17) 0.0186(16) 0.0157(14) -0.0010(13) 0.0097(13) 0.0001(14)
C5 0.0228(15) 0.0238(17) 0.0172(15) -0.0009(13) 0.0081(12) 0.0018(14)
C6 0.0273(17) 0.0202(17) 0.0108(13) 0.0004(12) 0.0097(13) 0.0010(14)
C7 0.0226(16) 0.0238(18) 0.0268(16) 0.0004(14) 0.0101(13) -0.0028(14)
C8 0.0252(17) 0.042(2) 0.0404(19) -0.0023(17) 0.0194(15) -0.0048(17)
C9 0.0242(17) 0.047(2) 0.0342(18) 0.0029(17) 0.0066(14) -0.0080(17)
C10 0.0284(19) 0.031(2) 0.056(2) -0.0011(17) 0.0186(17) -0.0089(16)
C11 0.0346(18) 0.0188(17) 0.0365(18) 0.0005(15) 0.0153(15) 0.0035(16)
C12 0.042(2) 0.0203(19) 0.065(3) -0.0094(18) 0.0218(19) -0.0021(17)
C13 0.069(3) 0.040(2) 0.053(2) 0.0222(19) 0.028(2) 0.020(2)
C14 0.033(2) 0.023(2) 0.064(2) 0.0009(17) 0.0125(18) 0.0094(16)
C15 0.0178(14) 0.0139(16) 0.0252(15) 0.0040(13) 0.0075(12) 0.0016(13)
C16 0.0201(15) 0.0191(18) 0.0214(15) -0.0014(12) 0.0058(12) -0.0001(13)
C17 0.0219(15) 0.0150(16) 0.0250(15) 0.0019(13) 0.0102(12) 0.0010(13)
C18 0.0178(15) 0.0195(17) 0.0263(16) 0.0003(13) 0.0088(13) -0.0011(13)
C19 0.0228(16) 0.0164(17) 0.0223(15) 0.0018(13) 0.0074(13) 0.0017(13)
C20 0.0246(17) 0.0167(17) 0.0223(15) 0.0032(13) 0.0108(13) 0.0016(14)
C21 0.0249(16) 0.0231(18) 0.0231(15) 0.0050(13) 0.0100(13) 0.0038(13)
C22 0.0361(19) 0.0306(19) 0.0262(17) 0.0058(15) 0.0154(15) 0.0073(16)
C23 0.0369(19) 0.029(2) 0.0215(16) -0.0045(14) 0.0063(14) 0.0046(16)
C24 0.0277(17) 0.0224(18) 0.0252(16) 0.0009(14) 0.0046(14) 0.0001(15)
C25 0.0217(15) 0.0193(16) 0.0164(14) 0.0016(13) 0.0036(12) 0.0032(14)
C26 0.0246(16) 0.0148(16) 0.0250(16) -0.0014(13) 0.0112(13) -0.0025(14)
C27 0.0246(17) 0.0238(18) 0.0282(16) 0.0062(15) 0.0082(14) 0.0023(15)
C28 0.0284(18) 0.031(2) 0.044(2) 0.0065(17) 0.0204(16) 0.0012(16)
C29 0.048(2) 0.0247(19) 0.0351(19) 0.0019(15) 0.0267(17) -0.0006(17)
C30 0.041(2) 0.0234(18) 0.0229(16) 0.0027(14) 0.0109(15) -0.0025(16)
C31 0.0239(16) 0.0198(17) 0.0282(17) 0.0017(14) 0.0059(13) -0.0027(14)
C32 0.0264(17) 0.0212(16) 0.0261(16) 0.0005(14) 0.0111(14) -0.0014(14)
C33 0.0397(19) 0.027(2) 0.0256(16) -0.0015(14) 0.0159(15) -0.0032(16)
C34 0.0343(19) 0.0294(19) 0.0212(16) -0.0020(14) 0.0051(14) -0.0085(16)
C35 0.0252(18) 0.0279(18) 0.0296(17) 0.0022(15) 0.0041(14) -0.0041(15)
C36 0.0259(16) 0.0194(17) 0.0261(16) 0.0053(14) 0.0092(13) -0.0041(14)
C37 0.0246(16) 0.0221(18) 0.0244(16) 0.0052(14) 0.0045(13) 0.0123(14)
C38 0.0299(18) 0.032(2) 0.0329(18) 0.0062(16) 0.0140(15) 0.0093(16)
C39 0.044(2) 0.052(3) 0.037(2) 0.0126(19) 0.0217(17) 0.021(2)
C40 0.060(3) 0.049(3) 0.036(2) -0.006(2) 0.0156(19) 0.027(2)
C41 0.050(2) 0.030(2) 0.043(2) -0.0058(18) 0.0053(19) 0.0128(19)
C42 0.0336(19) 0.0237(19) 0.0370(19) -0.0025(15) 0.0074(15) 0.0081(16)
C43 0.0237(16) 0.035(2) 0.0212(15) -0.0062(15) 0.0056(13) -0.0034(15)
C44 0.034(2) 0.075(3) 0.062(3) -0.046(2) 0.005(2) 0.000(2)
C45 0.0271(18) 0.050(3) 0.040(2) -0.0166(18) 0.0093(15) -0.0095(18)
C46 0.063(3) 0.087(4) 0.033(2) 0.015(2) -0.005(2) -0.032(3)
C47 0.0211(16) 0.0264(19) 0.0279(17) -0.0045(14) 0.0107(14) -0.0013(14)
C48 0.0337(19) 0.045(2) 0.039(2) -0.0138(17) 0.0231(16) -0.0092(17)
C49 0.0292(18) 0.0277(19) 0.0380(19) -0.0111(15) 0.0133(15) -0.0002(16)
C50 0.044(2) 0.046(2) 0.0255(17) -0.0016(16) 0.0161(16) 0.0039(19)
 
_geom_special_details
;
 All esds (except the esd in the dihedral angle between two l.s. planes)
 are estimated using the full covariance matrix.  The cell esds are taken
 into account individually in the estimation of esds in distances, angles
 and torsion angles; correlations between esds in cell parameters are only
 used when they are defined by crystal symmetry.  An approximate (isotropic)
 treatment of cell esds is used for estimating esds involving l.s. planes.
;
 
loop_
 _geom_bond_atom_site_label_1
 _geom_bond_atom_site_label_2
 _geom_bond_distance
 _geom_bond_site_symmetry_2
 _geom_bond_publ_flag
Os1 N4 1.975(2) . ?
Os1 N7 1.983(2) . ?
Os1 N1 2.007(2) . ?
Os1 N2 2.007(2) . ?
Os1 O1 2.037(2) . ?
Os1 N5 2.044(2) . ?
O1 C1 1.327(3) . ?
N1 C6 1.387(4) . ?
N1 C15 1.436(3) . ?
N2 C21 1.356(4) . ?
N2 C25 1.368(4) . ?
N3 N4 1.332(3) . ?
N3 C25 1.351(4) . ?
N4 C26 1.437(4) . ?
N5 C32 1.352(4) . ?
N5 C36 1.369(4) . ?
N6 N7 1.341(3) . ?
N6 C36 1.348(4) . ?
N7 C37 1.418(4) . ?
C1 C2 1.402(4) . ?
C1 C6 1.423(4) . ?
C2 C3 1.376(4) . ?
C2 C7 1.542(4) . ?
C3 C4 1.409(4) . ?
C3 H3 0.9500 . ?
C4 C5 1.375(4) . ?
C4 C11 1.532(4) . ?
C5 C6 1.391(4) . ?
C5 H5 0.9500 . ?
C7 C10 1.522(4) . ?
C7 C9 1.527(4) . ?
C7 C8 1.531(4) . ?
C8 H8A 0.9800 . ?
C8 H8B 0.9800 . ?
C8 H8C 0.9800 . ?
C9 H9A 0.9800 . ?
C9 H9B 0.9800 . ?
C9 H9C 0.9800 . ?
C10 H10A 0.9800 . ?
C10 H10B 0.9800 . ?
C10 H10C 0.9800 . ?
C11 C14 1.527(5) . ?
C11 C13 1.533(5) . ?
C11 C12 1.534(5) . ?
C12 H12A 0.9800 . ?
C12 H12B 0.9800 . ?
C12 H12C 0.9800 . ?
C13 H13A 0.9800 . ?
C13 H13B 0.9800 . ?
C13 H13C 0.9800 . ?
C14 H14A 0.9800 . ?
C14 H14B 0.9800 . ?
C14 H14C 0.9800 . ?
C15 C16 1.375(4) . ?
C15 C20 1.384(4) . ?
C16 C17 1.391(4) . ?
C16 H16 0.9500 . ?
C17 C18 1.402(4) . ?
C17 C47 1.525(4) . ?
C18 C19 1.390(4) . ?
C18 H18 0.9500 . ?
C19 C20 1.394(4) . ?
C19 C43 1.542(4) . ?
C20 H20 0.9500 . ?
C21 C22 1.359(4) . ?
C21 H21 0.9500 . ?
C22 C23 1.403(4) . ?
C22 H22 0.9500 . ?
C23 C24 1.354(4) . ?
C23 H23 0.9500 . ?
C24 C25 1.402(4) . ?
C24 H24 0.9500 . ?
C26 C31 1.384(4) . ?
C26 C27 1.386(4) . ?
C27 C28 1.379(4) . ?
C27 H27 0.9500 . ?
C28 C29 1.381(4) . ?
C28 H28 0.9500 . ?
C29 C30 1.379(4) . ?
C29 H29 0.9500 . ?
C30 C31 1.380(4) . ?
C30 H30 0.9500 . ?
C31 H31 0.9500 . ?
C32 C33 1.363(4) . ?
C32 H32 0.9500 . ?
C33 C34 1.397(5) . ?
C33 H33 0.9500 . ?
C34 C35 1.359(5) . ?
C34 H34 0.9500 . ?
C35 C36 1.403(4) . ?
C35 H35 0.9500 . ?
C37 C38 1.384(4) . ?
C37 C42 1.389(4) . ?
C38 C39 1.383(5) . ?
C38 H38 0.9500 . ?
C39 C40 1.372(6) . ?
C39 H39 0.9500 . ?
C40 C41 1.373(5) . ?
C40 H40 0.9500 . ?
C41 C42 1.372(5) . ?
C41 H41 0.9500 . ?
C42 H42 0.9500 . ?
C43 C46 1.516(5) . ?
C43 C45 1.525(4) . ?
C43 C44 1.526(5) . ?
C44 H44A 0.9800 . ?
C44 H44B 0.9800 . ?
C44 H44C 0.9800 . ?
C45 H45A 0.9800 . ?
C45 H45B 0.9800 . ?
C45 H45C 0.9800 . ?
C46 H46A 0.9800 . ?
C46 H46B 0.9800 . ?
C46 H46C 0.9800 . ?
C47 C49 1.522(4) . ?
C47 C48 1.529(4) . ?
C47 C50 1.534(4) . ?
C48 H48A 0.9800 . ?
C48 H48B 0.9800 . ?
C48 H48C 0.9800 . ?
C49 H49A 0.9800 . ?
C49 H49B 0.9800 . ?
C49 H49C 0.9800 . ?
C50 H50A 0.9800 . ?
C50 H50B 0.9800 . ?
C50 H50C 0.9800 . ?
 
loop_
 _geom_angle_atom_site_label_1
 _geom_angle_atom_site_label_2
 _geom_angle_atom_site_label_3
 _geom_angle
 _geom_angle_site_symmetry_1
 _geom_angle_site_symmetry_3
 _geom_angle_publ_flag
N4 Os1 N7 104.71(10) . . ?
N4 Os1 N1 93.74(10) . . ?
N7 Os1 N1 160.97(10) . . ?
N4 Os1 N2 75.52(9) . . ?
N7 Os1 N2 93.88(9) . . ?
N1 Os1 N2 95.24(9) . . ?
N4 Os1 O1 169.63(8) . . ?
N7 Os1 O1 83.65(9) . . ?
N1 Os1 O1 78.55(9) . . ?
N2 Os1 O1 98.09(9) . . ?
N4 Os1 N5 105.56(9) . . ?
N7 Os1 N5 75.68(10) . . ?
N1 Os1 N5 95.13(9) . . ?
N2 Os1 N5 169.48(9) . . ?
O1 Os1 N5 82.24(9) . . ?
C1 O1 Os1 115.29(17) . . ?
C6 N1 C15 117.4(2) . . ?
C6 N1 Os1 115.84(18) . . ?
C15 N1 Os1 126.7(2) . . ?
C21 N2 C25 118.6(2) . . ?
C21 N2 Os1 126.1(2) . . ?
C25 N2 Os1 114.96(18) . . ?
N4 N3 C25 109.9(2) . . ?
N3 N4 C26 112.7(2) . . ?
N3 N4 Os1 121.69(18) . . ?
C26 N4 Os1 124.63(18) . . ?
C32 N5 C36 118.5(2) . . ?
C32 N5 Os1 129.8(2) . . ?
C36 N5 Os1 111.61(19) . . ?
N7 N6 C36 110.5(2) . . ?
N6 N7 C37 114.5(2) . . ?
N6 N7 Os1 118.07(19) . . ?
C37 N7 Os1 124.21(18) . . ?
O1 C1 C2 124.0(3) . . ?
O1 C1 C6 116.4(3) . . ?
C2 C1 C6 119.7(3) . . ?
C3 C2 C1 117.5(3) . . ?
C3 C2 C7 122.2(3) . . ?
C1 C2 C7 120.4(3) . . ?
C2 C3 C4 123.9(3) . . ?
C2 C3 H3 118.1 . . ?
C4 C3 H3 118.1 . . ?
C5 C4 C3 117.8(3) . . ?
C5 C4 C11 122.5(3) . . ?
C3 C4 C11 119.6(3) . . ?
C4 C5 C6 120.7(3) . . ?
C4 C5 H5 119.6 . . ?
C6 C5 H5 119.6 . . ?
N1 C6 C5 126.5(3) . . ?
N1 C6 C1 113.1(3) . . ?
C5 C6 C1 120.2(3) . . ?
C10 C7 C9 107.7(3) . . ?
C10 C7 C8 108.5(3) . . ?
C9 C7 C8 109.5(3) . . ?
C10 C7 C2 111.7(3) . . ?
C9 C7 C2 109.8(2) . . ?
C8 C7 C2 109.6(2) . . ?
C7 C8 H8A 109.5 . . ?
C7 C8 H8B 109.5 . . ?
H8A C8 H8B 109.5 . . ?
C7 C8 H8C 109.5 . . ?
H8A C8 H8C 109.5 . . ?
H8B C8 H8C 109.5 . . ?
C7 C9 H9A 109.5 . . ?
C7 C9 H9B 109.5 . . ?
H9A C9 H9B 109.5 . . ?
C7 C9 H9C 109.5 . . ?
H9A C9 H9C 109.5 . . ?
H9B C9 H9C 109.5 . . ?
C7 C10 H10A 109.5 . . ?
C7 C10 H10B 109.5 . . ?
H10A C10 H10B 109.5 . . ?
C7 C10 H10C 109.5 . . ?
H10A C10 H10C 109.5 . . ?
H10B C10 H10C 109.5 . . ?
C14 C11 C4 112.7(3) . . ?
C14 C11 C13 108.4(3) . . ?
C4 C11 C13 108.7(3) . . ?
C14 C11 C12 107.9(3) . . ?
C4 C11 C12 110.1(3) . . ?
C13 C11 C12 109.1(3) . . ?
C11 C12 H12A 109.5 . . ?
C11 C12 H12B 109.5 . . ?
H12A C12 H12B 109.5 . . ?
C11 C12 H12C 109.5 . . ?
H12A C12 H12C 109.5 . . ?
H12B C12 H12C 109.5 . . ?
C11 C13 H13A 109.5 . . ?
C11 C13 H13B 109.5 . . ?
H13A C13 H13B 109.5 . . ?
C11 C13 H13C 109.5 . . ?
H13A C13 H13C 109.5 . . ?
H13B C13 H13C 109.5 . . ?
C11 C14 H14A 109.5 . . ?
C11 C14 H14B 109.5 . . ?
H14A C14 H14B 109.5 . . ?
C11 C14 H14C 109.5 . . ?
H14A C14 H14C 109.5 . . ?
H14B C14 H14C 109.5 . . ?
C16 C15 C20 119.8(3) . . ?
C16 C15 N1 120.3(3) . . ?
C20 C15 N1 119.9(3) . . ?
C15 C16 C17 121.8(3) . . ?
C15 C16 H16 119.1 . . ?
C17 C16 H16 119.1 . . ?
C16 C17 C18 117.4(3) . . ?
C16 C17 C47 119.5(3) . . ?
C18 C17 C47 123.1(3) . . ?
C19 C18 C17 122.0(3) . . ?
C19 C18 H18 119.0 . . ?
C17 C18 H18 119.0 . . ?
C18 C19 C20 118.3(3) . . ?
C18 C19 C43 122.7(3) . . ?
C20 C19 C43 118.9(3) . . ?
C15 C20 C19 120.7(3) . . ?
C15 C20 H20 119.7 . . ?
C19 C20 H20 119.7 . . ?
N2 C21 C22 122.0(3) . . ?
N2 C21 H21 119.0 . . ?
C22 C21 H21 119.0 . . ?
C21 C22 C23 119.5(3) . . ?
C21 C22 H22 120.2 . . ?
C23 C22 H22 120.2 . . ?
C24 C23 C22 119.4(3) . . ?
C24 C23 H23 120.3 . . ?
C22 C23 H23 120.3 . . ?
C23 C24 C25 119.4(3) . . ?
C23 C24 H24 120.3 . . ?
C25 C24 H24 120.3 . . ?
N3 C25 N2 117.4(2) . . ?
N3 C25 C24 121.5(3) . . ?
N2 C25 C24 121.0(3) . . ?
C31 C26 C27 120.8(3) . . ?
C31 C26 N4 118.7(3) . . ?
C27 C26 N4 120.5(2) . . ?
C28 C27 C26 118.9(3) . . ?
C28 C27 H27 120.6 . . ?
C26 C27 H27 120.6 . . ?
C27 C28 C29 120.9(3) . . ?
C27 C28 H28 119.6 . . ?
C29 C28 H28 119.6 . . ?
C30 C29 C28 119.6(3) . . ?
C30 C29 H29 120.2 . . ?
C28 C29 H29 120.2 . . ?
C29 C30 C31 120.4(3) . . ?
C29 C30 H30 119.8 . . ?
C31 C30 H30 119.8 . . ?
C30 C31 C26 119.4(3) . . ?
C30 C31 H31 120.3 . . ?
C26 C31 H31 120.3 . . ?
N5 C32 C33 122.1(3) . . ?
N5 C32 H32 118.9 . . ?
C33 C32 H32 118.9 . . ?
C32 C33 C34 119.5(3) . . ?
C32 C33 H33 120.3 . . ?
C34 C33 H33 120.3 . . ?
C35 C34 C33 119.7(3) . . ?
C35 C34 H34 120.1 . . ?
C33 C34 H34 120.1 . . ?
C34 C35 C36 118.9(3) . . ?
C34 C35 H35 120.5 . . ?
C36 C35 H35 120.5 . . ?
N6 C36 N5 118.3(3) . . ?
N6 C36 C35 120.4(3) . . ?
N5 C36 C35 121.1(3) . . ?
C38 C37 C42 120.3(3) . . ?
C38 C37 N7 120.6(3) . . ?
C42 C37 N7 118.8(3) . . ?
C39 C38 C37 118.9(3) . . ?
C39 C38 H38 120.5 . . ?
C37 C38 H38 120.5 . . ?
C40 C39 C38 120.7(4) . . ?
C40 C39 H39 119.6 . . ?
C38 C39 H39 119.6 . . ?
C39 C40 C41 120.0(4) . . ?
C39 C40 H40 120.0 . . ?
C41 C40 H40 120.0 . . ?
C42 C41 C40 120.4(4) . . ?
C42 C41 H41 119.8 . . ?
C40 C41 H41 119.8 . . ?
C41 C42 C37 119.6(3) . . ?
C41 C42 H42 120.2 . . ?
C37 C42 H42 120.2 . . ?
C46 C43 C45 108.0(3) . . ?
C46 C43 C44 110.6(3) . . ?
C45 C43 C44 106.8(3) . . ?
C46 C43 C19 108.5(3) . . ?
C45 C43 C19 112.6(3) . . ?
C44 C43 C19 110.2(3) . . ?
C43 C44 H44A 109.5 . . ?
C43 C44 H44B 109.5 . . ?
H44A C44 H44B 109.5 . . ?
C43 C44 H44C 109.5 . . ?
H44A C44 H44C 109.5 . . ?
H44B C44 H44C 109.5 . . ?
C43 C45 H45A 109.5 . . ?
C43 C45 H45B 109.5 . . ?
H45A C45 H45B 109.5 . . ?
C43 C45 H45C 109.5 . . ?
H45A C45 H45C 109.5 . . ?
H45B C45 H45C 109.5 . . ?
C43 C46 H46A 109.5 . . ?
C43 C46 H46B 109.5 . . ?
H46A C46 H46B 109.5 . . ?
C43 C46 H46C 109.5 . . ?
H46A C46 H46C 109.5 . . ?
H46B C46 H46C 109.5 . . ?
C49 C47 C17 108.3(3) . . ?
C49 C47 C48 108.2(3) . . ?
C17 C47 C48 112.6(2) . . ?
C49 C47 C50 108.7(3) . . ?
C17 C47 C50 110.5(3) . . ?
C48 C47 C50 108.3(3) . . ?
C47 C48 H48A 109.5 . . ?
C47 C48 H48B 109.5 . . ?
H48A C48 H48B 109.5 . . ?
C47 C48 H48C 109.5 . . ?
H48A C48 H48C 109.5 . . ?
H48B C48 H48C 109.5 . . ?
C47 C49 H49A 109.5 . . ?
C47 C49 H49B 109.5 . . ?
H49A C49 H49B 109.5 . . ?
C47 C49 H49C 109.5 . . ?
H49A C49 H49C 109.5 . . ?
H49B C49 H49C 109.5 . . ?
C47 C50 H50A 109.5 . . ?
C47 C50 H50B 109.5 . . ?
H50A C50 H50B 109.5 . . ?
C47 C50 H50C 109.5 . . ?
H50A C50 H50C 109.5 . . ?
H50B C50 H50C 109.5 . . ?
 
loop_
 _geom_torsion_atom_site_label_1
 _geom_torsion_atom_site_label_2
 _geom_torsion_atom_site_label_3
 _geom_torsion_atom_site_label_4
 _geom_torsion
 _geom_torsion_site_symmetry_1
 _geom_torsion_site_symmetry_2
 _geom_torsion_site_symmetry_3
 _geom_torsion_site_symmetry_4
 _geom_torsion_publ_flag
N4 Os1 O1 C1 50.8(5) . . . . ?
N7 Os1 O1 C1 -164.98(19) . . . . ?
N1 Os1 O1 C1 8.24(17) . . . . ?
N2 Os1 O1 C1 101.99(18) . . . . ?
N5 Os1 O1 C1 -88.63(19) . . . . ?
N4 Os1 N1 C6 -179.61(19) . . . . ?
N7 Os1 N1 C6 14.5(4) . . . . ?
N2 Os1 N1 C6 -103.83(19) . . . . ?
O1 Os1 N1 C6 -6.61(18) . . . . ?
N5 Os1 N1 C6 74.39(19) . . . . ?
N4 Os1 N1 C15 3.6(2) . . . . ?
N7 Os1 N1 C15 -162.3(2) . . . . ?
N2 Os1 N1 C15 79.4(2) . . . . ?
O1 Os1 N1 C15 176.6(2) . . . . ?
N5 Os1 N1 C15 -102.4(2) . . . . ?
N4 Os1 N2 C21 -171.3(3) . . . . ?
N7 Os1 N2 C21 -67.1(2) . . . . ?
N1 Os1 N2 C21 96.2(2) . . . . ?
O1 Os1 N2 C21 17.1(2) . . . . ?
N5 Os1 N2 C21 -74.0(6) . . . . ?
N4 Os1 N2 C25 1.41(19) . . . . ?
N7 Os1 N2 C25 105.6(2) . . . . ?
N1 Os1 N2 C25 -91.1(2) . . . . ?
O1 Os1 N2 C25 -170.26(19) . . . . ?
N5 Os1 N2 C25 98.7(5) . . . . ?
C25 N3 N4 C26 177.3(2) . . . . ?
C25 N3 N4 Os1 8.2(3) . . . . ?
N7 Os1 N4 N3 -95.8(2) . . . . ?
N1 Os1 N4 N3 88.9(2) . . . . ?
N2 Os1 N4 N3 -5.5(2) . . . . ?
O1 Os1 N4 N3 47.3(6) . . . . ?
N5 Os1 N4 N3 -174.7(2) . . . . ?
N7 Os1 N4 C26 96.4(2) . . . . ?
N1 Os1 N4 C26 -78.9(2) . . . . ?
N2 Os1 N4 C26 -173.3(2) . . . . ?
O1 Os1 N4 C26 -120.5(5) . . . . ?
N5 Os1 N4 C26 17.5(2) . . . . ?
N4 Os1 N5 C32 -65.1(3) . . . . ?
N7 Os1 N5 C32 -166.7(3) . . . . ?
N1 Os1 N5 C32 30.2(3) . . . . ?
N2 Os1 N5 C32 -159.5(5) . . . . ?
O1 Os1 N5 C32 107.9(3) . . . . ?
N4 Os1 N5 C36 119.0(2) . . . . ?
N7 Os1 N5 C36 17.4(2) . . . . ?
N1 Os1 N5 C36 -145.7(2) . . . . ?
N2 Os1 N5 C36 24.5(6) . . . . ?
O1 Os1 N5 C36 -68.0(2) . . . . ?
C36 N6 N7 C37 -176.8(2) . . . . ?
C36 N6 N7 Os1 22.6(3) . . . . ?
N4 Os1 N7 N6 -125.3(2) . . . . ?
N1 Os1 N7 N6 40.2(4) . . . . ?
N2 Os1 N7 N6 158.7(2) . . . . ?
O1 Os1 N7 N6 60.9(2) . . . . ?
N5 Os1 N7 N6 -22.6(2) . . . . ?
N4 Os1 N7 C37 76.1(2) . . . . ?
N1 Os1 N7 C37 -118.4(3) . . . . ?
N2 Os1 N7 C37 0.1(2) . . . . ?
O1 Os1 N7 C37 -97.7(2) . . . . ?
N5 Os1 N7 C37 178.8(3) . . . . ?
Os1 O1 C1 C2 172.3(2) . . . . ?
Os1 O1 C1 C6 -8.5(3) . . . . ?
O1 C1 C2 C3 174.5(2) . . . . ?
C6 C1 C2 C3 -4.7(4) . . . . ?
O1 C1 C2 C7 -5.9(4) . . . . ?
C6 C1 C2 C7 174.9(2) . . . . ?
C1 C2 C3 C4 0.4(4) . . . . ?
C7 C2 C3 C4 -179.2(2) . . . . ?
C2 C3 C4 C5 2.5(4) . . . . ?
C2 C3 C4 C11 -175.9(3) . . . . ?
C3 C4 C5 C6 -1.0(4) . . . . ?
C11 C4 C5 C6 177.3(3) . . . . ?
C15 N1 C6 C5 -3.0(4) . . . . ?
Os1 N1 C6 C5 179.9(2) . . . . ?
C15 N1 C6 C1 -178.7(2) . . . . ?
Os1 N1 C6 C1 4.2(3) . . . . ?
C4 C5 C6 N1 -178.6(3) . . . . ?
C4 C5 C6 C1 -3.2(4) . . . . ?
O1 C1 C6 N1 2.9(4) . . . . ?
C2 C1 C6 N1 -177.8(2) . . . . ?
O1 C1 C6 C5 -173.1(2) . . . . ?
C2 C1 C6 C5 6.1(4) . . . . ?
C3 C2 C7 C10 3.0(4) . . . . ?
C1 C2 C7 C10 -176.5(3) . . . . ?
C3 C2 C7 C9 122.4(3) . . . . ?
C1 C2 C7 C9 -57.2(4) . . . . ?
C3 C2 C7 C8 -117.2(3) . . . . ?
C1 C2 C7 C8 63.2(3) . . . . ?
C5 C4 C11 C14 7.5(4) . . . . ?
C3 C4 C11 C14 -174.1(3) . . . . ?
C5 C4 C11 C13 -112.6(3) . . . . ?
C3 C4 C11 C13 65.8(4) . . . . ?
C5 C4 C11 C12 128.0(3) . . . . ?
C3 C4 C11 C12 -53.6(4) . . . . ?
C6 N1 C15 C16 -70.4(3) . . . . ?
Os1 N1 C15 C16 106.4(3) . . . . ?
C6 N1 C15 C20 109.4(3) . . . . ?
Os1 N1 C15 C20 -73.9(3) . . . . ?
C20 C15 C16 C17 0.5(5) . . . . ?
N1 C15 C16 C17 -179.8(3) . . . . ?
C15 C16 C17 C18 0.3(4) . . . . ?
C15 C16 C17 C47 -177.5(3) . . . . ?
C16 C17 C18 C19 -0.6(4) . . . . ?
C47 C17 C18 C19 177.1(3) . . . . ?
C17 C18 C19 C20 0.0(4) . . . . ?
C17 C18 C19 C43 -176.5(3) . . . . ?
C16 C15 C20 C19 -1.0(4) . . . . ?
N1 C15 C20 C19 179.2(3) . . . . ?
C18 C19 C20 C15 0.8(4) . . . . ?
C43 C19 C20 C15 177.5(3) . . . . ?
C25 N2 C21 C22 0.6(4) . . . . ?
Os1 N2 C21 C22 173.1(2) . . . . ?
N2 C21 C22 C23 0.3(5) . . . . ?
C21 C22 C23 C24 -0.4(5) . . . . ?
C22 C23 C24 C25 -0.5(5) . . . . ?
N4 N3 C25 N2 -6.5(4) . . . . ?
N4 N3 C25 C24 170.8(3) . . . . ?
C21 N2 C25 N3 175.8(3) . . . . ?
Os1 N2 C25 N3 2.5(3) . . . . ?
C21 N2 C25 C24 -1.6(4) . . . . ?
Os1 N2 C25 C24 -174.9(2) . . . . ?
C23 C24 C25 N3 -175.7(3) . . . . ?
C23 C24 C25 N2 1.6(4) . . . . ?
N3 N4 C26 C31 140.7(3) . . . . ?
Os1 N4 C26 C31 -50.6(4) . . . . ?
N3 N4 C26 C27 -41.8(4) . . . . ?
Os1 N4 C26 C27 127.0(3) . . . . ?
C31 C26 C27 C28 1.9(5) . . . . ?
N4 C26 C27 C28 -175.5(3) . . . . ?
C26 C27 C28 C29 -0.3(5) . . . . ?
C27 C28 C29 C30 -1.5(5) . . . . ?
C28 C29 C30 C31 1.7(5) . . . . ?
C29 C30 C31 C26 -0.1(5) . . . . ?
C27 C26 C31 C30 -1.7(5) . . . . ?
N4 C26 C31 C30 175.8(3) . . . . ?
C36 N5 C32 C33 3.8(5) . . . . ?
Os1 N5 C32 C33 -171.9(2) . . . . ?
N5 C32 C33 C34 -1.2(5) . . . . ?
C32 C33 C34 C35 -0.6(5) . . . . ?
C33 C34 C35 C36 -0.3(5) . . . . ?
N7 N6 C36 N5 -6.0(4) . . . . ?
N7 N6 C36 C35 170.6(3) . . . . ?
C32 N5 C36 N6 171.8(3) . . . . ?
Os1 N5 C36 N6 -11.7(3) . . . . ?
C32 N5 C36 C35 -4.7(4) . . . . ?
Os1 N5 C36 C35 171.7(2) . . . . ?
C34 C35 C36 N6 -173.5(3) . . . . ?
C34 C35 C36 N5 3.0(5) . . . . ?
N6 N7 C37 C38 -48.2(4) . . . . ?
Os1 N7 C37 C38 111.0(3) . . . . ?
N6 N7 C37 C42 137.4(3) . . . . ?
Os1 N7 C37 C42 -63.3(3) . . . . ?
C42 C37 C38 C39 1.3(5) . . . . ?
N7 C37 C38 C39 -173.0(3) . . . . ?
C37 C38 C39 C40 0.5(5) . . . . ?
C38 C39 C40 C41 -1.5(5) . . . . ?
C39 C40 C41 C42 0.8(5) . . . . ?
C40 C41 C42 C37 0.9(5) . . . . ?
C38 C37 C42 C41 -2.0(5) . . . . ?
N7 C37 C42 C41 172.4(3) . . . . ?
C18 C19 C43 C46 103.0(4) . . . . ?
C20 C19 C43 C46 -73.6(4) . . . . ?
C18 C19 C43 C45 -16.6(4) . . . . ?
C20 C19 C43 C45 166.9(3) . . . . ?
C18 C19 C43 C44 -135.8(3) . . . . ?
C20 C19 C43 C44 47.7(4) . . . . ?
C16 C17 C47 C49 67.4(4) . . . . ?
C18 C17 C47 C49 -110.3(3) . . . . ?
C16 C17 C47 C48 -173.0(3) . . . . ?
C18 C17 C47 C48 9.3(4) . . . . ?
C16 C17 C47 C50 -51.7(4) . . . . ?
C18 C17 C47 C50 130.6(3) . . . . ?
 
_diffrn_measured_fraction_theta_max    0.998
_diffrn_reflns_theta_full              25.00
_diffrn_measured_fraction_theta_full   0.998
_refine_diff_density_max    1.077
_refine_diff_density_min   -0.593
_refine_diff_density_rms    0.074
